# Supplementary material for: Assessment of Potentially Toxic Elements’ Contamination in the Soil of Greater Cairo, Egypt Using Geochemical and Magnetic Attributes
Source: MDPI journal article supplement (doi:10.3390/land11030319), 2022-02-22
Supplement: s1 [file s1]

## **SUPPORTING INFORMATION**

### **Assessment of potentially toxic elements contamination in the soil of Greater Cairo, Egypt using geochemical and magnetic attributes**

**Ahmed Saleh<sup>1,\*</sup>, Yehia H. Dawood<sup>2</sup>, and Ahmed Gad<sup>2,\*</sup>**

<sup>1</sup> National Research Institute of Astronomy and Geophysics (NRIAG), Helwan, Cairo 11421, Egypt

<sup>2</sup> Geology Department, Faculty of Science, Ain Shams University, Cairo 11566, Egypt;  
[yhdawood@sci.asu.edu.eg](mailto:yhdawood@sci.asu.edu.eg)

\* Correspondence: [ahmed.saleh@nriag.sci.eg](mailto:ahmed.saleh@nriag.sci.eg) (A.S.); [A.gad@sci.asu.edu.eg](mailto:A.gad@sci.asu.edu.eg) (A.G.)

**Total Pages: 3 including cover page and references**

**Total Tables: 1**

**Table S1.** Summary of the formulae used to calculate the single and integrated indices.

| S/N | Pollution Index                                                                                                                          | Criteria/Categories                                                                                                                                                                                                                                                                                                                                                                                                             | Reference                                                        |
|-----|------------------------------------------------------------------------------------------------------------------------------------------|---------------------------------------------------------------------------------------------------------------------------------------------------------------------------------------------------------------------------------------------------------------------------------------------------------------------------------------------------------------------------------------------------------------------------------|------------------------------------------------------------------|
| 1   | Enrichment Factor (EF)<br>$EF = (E/Al)_{\text{Sample}} / (E/Al)_{\text{Crust}}$                                                          | 1. $EF < 2$ : no enrichment<br>2. $EF = 2-5$ : moderate enrichment<br>3. $EF = 5-20$ : significant enrichment<br>4. $EF = 20-40$ : very high enrichment<br>5. $EF > 40$ : extremely high enrichment                                                                                                                                                                                                                             | Loska et al. (2004)<br>Saha et al. (2017)                        |
| 2   | Geo-accumulation index ( $I_{\text{geo}}$ )<br>$I_{\text{geo}} = \log_2 (C_n / 1.5 B_n)$                                                 | 1. $I_{\text{geo}} < 0$ : practically uncontaminated<br>2. $I_{\text{geo}} = 0-1$ : uncontaminated to moderately contaminated<br>3. $I_{\text{geo}} = 1-2$ : moderately contaminated<br>4. $I_{\text{geo}} = 2-3$ : moderately to heavily contaminated<br>5. $I_{\text{geo}} = 3-4$ : heavily contaminated<br>6. $I_{\text{geo}} = 4-5$ : heavily to extremely contaminated<br>7. $I_{\text{geo}} > 5$ : extremely contaminated | Müller (1969)<br>Förstner (1990)                                 |
| 3   | Improved Nemerow's Pollution Index ( $P_n$ )<br>$P_n = \sqrt{(I_{\text{geomax}}^2 + I_{\text{geoave}}^2)/2}$                             | 1. $P_n = 0-0.5$ : practically uncontaminated<br>2. $P_n = 0.5-1$ : uncontaminated to moderately contaminated<br>3. $P_n = 1-2$ : moderately contaminated<br>4. $P_n = 2-3$ : moderately to heavily contaminated<br>5. $P_n = 3-4$ : heavily contaminated<br>6. $P_n = 4-5$ : heavily to extremely contaminated<br>7. $P_n > 5$ : extremely contaminated                                                                        | Guan et al. (2014)                                               |
| 4   | Pollution Load Index (PLI)<br>$PLI = (C_f^1 * C_f^2 * C_f^3 * \dots * C_f^n)^{1/n}$<br>$C_f = C_{\text{sample}} / C_{\text{background}}$ | 1. $PLI < 1$ : unpolluted<br>2. $PLI = 1-2$ : moderately polluted<br>3. $PLI = 2-10$ : strongly polluted<br>4. $PLI > 10$ : extremely polluted                                                                                                                                                                                                                                                                                  | Tomlinson et al. (1980)<br>Hakanson (1980)<br>Chon et al. (1996) |
| 5   | Potential Ecological Risk Index (PERI)<br>$PERI = \sum_{i=1}^n E_r^i$<br>$E_r^i = T_r^i * C_f^i$                                         | 1. Class 1 ( $PERI \leq 50$ : low risk)<br>2. Class 2 ( $50 < PERI \leq 100$ : moderate risk)<br>3. Class 3 ( $100 < PERI \leq 150$ : high risk)<br>4. Class 4 ( $150 < PERI \leq 200$ : very high risk)<br>5. Class 5 ( $PERI > 200$ : extreme risk)                                                                                                                                                                           | Hakanson (1980)<br>Guan et al. (2014)                            |

where  $(M/Al)_{\text{Sample}}$  and  $(M/Al)_{\text{Crust}}$  refer, respectively to the ration of the concentration of the target element E and Al in the soil samples and the upper continental crust.  $C_n$  denotes the measured concentration of PTE n in a soil sample and  $B_n$  denotes the concentration of PTE n in the upper continental crust.  $I_{\text{geomax}}$  is the maximum  $I_{\text{geo}}$  value and  $I_{\text{geoave}}$  is the arithmetic mean value of  $I_{\text{geo}}$ . n is the number of elements studied and  $C_f^n$  is contamination factor for  $n^{\text{th}}$  element.  $C_{\text{metal}}$  refer to element concentration in a soil sample,  $C_{\text{background}}$  refer to concentration of that element in the upper continental crust.  $E_r^i$  is potential ecological risk for  $i^{\text{th}}$  PTE,  $T_r^i$  is toxic response factor of  $i^{\text{th}}$  PTE,  $C_f^i$  is the contamination factor. Toxic response factor for Co, Cr, Cu, Hg, Ni, Pb, V, and Zn is 5, 2, 5, 40, 6, 5, 2, and 1, respectively (Hakanson, 1980; Guan et al., 2014; Chai et al., 2017; Khalifa and Gad, 2018).

## References

1. Chai, L.; Li, H.; Yang, Z.; Min, X.; Liao, Q.; Liu, Y.; Men, S.; Yan, Y.; Xu, J. Heavy metals and metalloids in the surface sediments of the Xiangjiang River, Hunan, China: distribution, contamination, and ecological risk assessment. *Environ. Sci. Pollut. Res.* **2017**, *24*, 874–885. <https://doi.org/10.1007/s11356-016-7872-x>.
2. Chon, H.T.; Cho, C.H.; Kim, K.W.; Moon, H.S. The occurrence and dispersion of potentially toxic elements in areas covered with black shale's and slates in Korea. *Appl. Geochem.* **1996**, *11*, 69–76. [https://doi.org/10.1016/0883-2927\(95\)00061-5](https://doi.org/10.1016/0883-2927(95)00061-5).
3. Förstner, U. *Contaminated Sediments*; Lecture Notes in Earth Science, 21; Springer: Berlin, Germany, 1990.
4. Guan, Y.; Shao, C.; Ju, M. Heavy metal contamination assessment and partition for industrial and mining gathering areas. *Int. J. Environ. Res. Public Health* **2014**, *11*, 7286–7303. <https://doi.org/10.3390/ijerph110707286>.
5. Hakanson, L. An ecological risk index for aquatic pollution control: A sedimentological approach. *Water Res.* **1980**, *14*, 975–1001. [https://doi.org/10.1016/0043-1354\(80\)90143-8](https://doi.org/10.1016/0043-1354(80)90143-8).
6. Khalifa, M.; Gad, A. Assessment of heavy metals contamination in agricultural soil of southwestern Nile Delta, Egypt. *Soil. Sediment. Contam.* **2018**, *27*, 619–642. <https://doi.org/10.1080/15320383.2018.1498445>.
7. Loska, K.; Wiechula, D.; Korus, I. Metal contamination of farming soils affected by industry. *Environ. Int.* **2004**, *30*, 159–165. [https://doi.org/10.1016/S0160-4120\(03\)00157-0](https://doi.org/10.1016/S0160-4120(03)00157-0).
8. Müller, G. Index of geoaccumulation in sediments of the Rhine River. *Geo. J.* **1969**, *2*, 108–118.
9. Saha, J.K.; Selladurai, R.; Coumar, M.V.; Dotaniya, M.L.; Kundu, S.; Patra, A.K. *Soil Pollution—An Emerging Threat to Agriculture*; Springer Nature: Singapore, 2017.
10. Tomlinson, D.C.; Wilson, D.J.; Harris, C.R.; Jeffrey, D.W. Problem in heavy metals in estuaries and the formation of pollution index. *Helgol. Meeresunters* **1980**, *33*, 566–575. <https://doi.org/10.1007/BF02414780>.
